# Supplementary material for: Remyelination alters the pattern of myelin in the cerebral cortex
Source: eLife. 2020 May 27;9:e56621. doi: 10.7554/eLife.56621 (PMC7292648; doi:10.7554/eLife.56621)
Supplement: Source data 1. [file elife-56621-data1.xlsx]

## Sheet: Figure 1
	Data for Figure 1 H, I
	Var1	wktots_ctrl		cumwknew_ctrl		cumwkloss_ctrl		Var5	wktots_cupr		cumwknew_cupr		cumwkloss_cupr
timepoint	N	Mean	SEM	mean	SEM	mean	SEM	N	Mean	SEM	mean	SEM	mean	SEM
baseline	5	1	0	NaN	NaN	NaN	NaN	6	1	0	NaN	NaN	NaN	NaN
week 1	4	1.04863	0.0137023	0.0505353	0.0146992	0.998092	0.0019084	4	0.983073	0.00913642	0.00280138	0.00175943	0.980272	0.0107778
week 2	3	1.08752	0.0255145	0.0930975	0.0279455	0.994425	0.00281898	6	0.920068	0.0490891	0.00460044	0.00351674	0.915467	0.0525094
week 3	5	1.10822	0.0131969	0.107493	0.0178259	0.996655	0.00206124	6	0.803585	0.0675262	0.0197584	0.0125005	0.786632	0.0791332
week 4	5	1.13159	0.0101746	0.115712	0.018747	0.996655	0.00206124	6	0.5493	0.0764021	0.114376	0.0204054	0.437729	0.0830185
week 5	5	1.1462	0.00853901	0.133094	0.0156553	0.993875	0.00130528	6	0.406629	0.0775334	0.250931	0.0249687	0.167019	0.0566337
week 6	5	1.14398	0.0139752	0.12906	0.0128518	0.995693	0.00152087	6	0.388591	0.0381427	0.308319	0.0135969	0.0830767	0.0300827
week 7	5	1.1756	0.0196693	0.155605	0.0145033	0.996326	0.00175357	5	0.404749	0.0289102	0.352715	0.0169817	0.0553997	0.0212568
week 8	4	1.19608	0.0355571	0.169184	0.0249033	0.997316	0.00186858	5	0.448592	0.0309734	0.399209	0.0178281	0.0527487	0.0219
week 9	3	1.22338	0.0533921	0.190302	0.0401012	0.993631	0.00379663	3	0.45712	0.0456981	0.422025	0.0336375	0.0407042	0.0335637
week 10	1	1.1377	0	0.130485	0	0.986866	0	3	0.505333	0.0387668	0.470238	0.0322416	0.0407042	0.0335637
week 11	1	1.13907	0	0.137064	0	0.981658	0	3	0.547075	0.0317864	0.512669	0.0283446	0.0400155	0.0338351
week 12	0	NaN	NaN	NaN	NaN	NaN	NaN	2	0.601791	0.080886	0.552114	0.0285112	0.0580909	0.0491924
week 13	1	1.15607	0	0.155768	0	0.979957	0	0	NaN	NaN	NaN	NaN	NaN	NaN
week 14	1	1.15958	0	0.151624	0	0.979107	0	2	0.650123	0.0878594	0.601487	0.0365262	0.0570493	0.0481508
week 15	0	NaN	NaN	NaN	NaN	NaN	NaN	2	0.657847	0.0917195	0.587354	0.037071	0.0547412	0.0479794
week 16	0	NaN	NaN	NaN	NaN	NaN	NaN	0	NaN	NaN	NaN	NaN	NaN	NaN
Figure 1 J,K
	lossrates_ctl		newrates_ctrl		lossrates_cup		newrates_cup					LOSS - ANOVA TABLE
	Mean	SEM	mean	SEM	mean	SEM	mean	SEM				Source'	Sum Sq.'	d.f.'	Singular?'	Mean Sq.'	F'	Prob>F'
week 1	0.0019084	0.0019084	0.0505353	0.0146992	-0.0197282	0.0107778	0.00280138	0.00175943				timepoint'	0.324445	8	0	0.0405556	13.8559	1.02585e-11
week 2	0.0030303	0.0030303	0.035754	0.0124831	-0.0684263	0.0455094	0.00258297	0.0024076				condition'	0.203239	1	0	0.203239	69.4368	5.44839e-12
week 3	0	0	0.030456	0.00460162	-0.13179	0.0282461	0.0153078	0.00919023				timepoint*condition'	0.324145	8	0	0.0405181	13.8431	1.04498e-11
week 4	0	0	0.0233752	0.00499736	-0.348903	0.0331779	0.0946178	0.0155887				Error'	0.199033	68	0	0.00292696	[]	[]
week 5	0.00277985	0.00145059	0.0173823	0.00720292	-0.27071	0.0484205	0.136555	0.0228209				Total'	1.18135	85	0	[]	[]	[]
week 6	0	0	0.00968454	0.00481392	-0.062648	0.01624	0.0729	0.00707474
week 7	0	0	0.0189898	0.010023	-0.00402395	0.00218209	0.0511887	0.00355446				LOSS - BONFERRONI CORRECTED P VALUES
week 8	0	0	0.0200527	0.011601	-0.00265094	0.00137113	0.0464939	0.0074943			week	baseline	1	2	3	4	5	6	7	8
week 9	0.00279096	0.00151508	0.0170652	0.00649466	-0.00138889	0.00138889	0.0348115	0.00459119			p	1.39173	3.23261	0.0201447	4.87537e-05	0.00661761	0.0615321	0.921624	1.18752	4.79334
												NEW - ANOVA TABLE
												Source'	Sum Sq.'	d.f.'	Singular?'	Mean Sq.'	F'	Prob>F'
												timepoint'	0.0287743	8	0	0.00359678	6.35407	3.90938e-06
												condition'	0.013742	1	0	0.013742	24.2767	5.62696e-06
												timepoint*condition'	0.0552054	8	0	0.00690067	12.1907	1.23377e-10
												Error'	0.0384921	68	0	0.00056606	[]	[]
												Total'	0.152183	85	0	[]	[]	[]
												NEW -BONFERRONI CORRECTED P VALUES
											week	baseline	1	2	3	4	5	6	7	8
											p	0.162341	0.0664726	1.80793	0.0280305	0.0120515	0.000529831	0.147288	0.778692	0.805399

## Sheet: Figure 2
Figure 2 B,C
0-100 micron
Means, Cuprizone							SEM, Cuprizone						Means, Control						SEM, Control
timepoint	proportion cells total per week	proportion cells lost per week	proportion of cells gained per week	cumulative proportion of cells surviving	cumulative proportion cells gained		proportion cells total per week	proportion cells lost per week	proportion of cells gained per week	cumulative proportion of cells surviving	cumulative proportion cells gained		proportion cells total per week	proportion cells lost per week	proportion of cells gained per week	cumulative proportion of cells surviving	cumulative proportion cells gained		proportion cells total per week	proportion cells lost per week	proportion of cells gained per week	cumulative proportion of cells surviving	cumulative proportion cells gained
baseline	1	NaN	NaN	NaN	NaN		0	NaN	NaN	NaN	NaN		1	NaN	NaN	NaN	NaN		0	NaN	NaN	NaN	NaN
week 1	0.975	0.0309524	0.00595238	0.969048	0.00595238		0.025	0.0236902	0.00595238	0.0236902	0.00595238		1.0594	0	0.0594	1	0.0594		0.03	0	0.03	0	0.03
week 2	0.930482	0.068361	0.0166667	0.909847	0.0206349		0.056311	0.0565511	0.0166667	0.0723556	0.0163423		1.0995	0	0.0338	1	0.0995		0.0544	0	0.015	0	0.0544
week 3	0.852689	0.115533	0.0377402	0.795471	0.0583751		0.0464364	0.0281707	0.0240077	0.0771936	0.0396198		1.1263	0	0.0357	1	0.1238		0.0412	0	0.0111	0	0.0428
week 4	0.816823	0.245828	0.209963	0.549643	0.268338		0.0443008	0.0278199	0.045127	0.0597716	0.0513119		1.1467	0	0.0204	1	0.1239		0.0455	0	0.0061	0	0.046
week 5	0.781199	0.240105	0.196147	0.309538	0.464485		0.0807971	0.0279545	0.0491476	0.0586818	0.0464852		1.1386	0.0081	0	0.9919	0.1239		0.0513	0.0081	0	0.0081	0.046
week 6	0.725623	0.123444	0.0981306	0.167016	0.559764		0.0826501	0.0410205	0.0301639	0.0538055	0.0620992		1.168	0	0.0274	0.9919	0.1533		0.0532	0	0.0195	0.0081	0.0441
week 7	0.686536	0.00277778	0.0385663	0.137641	0.550284		0.0594644	0.00277778	0.0159392	0.0569392	0.0507292		1.2136	0	0.0186	0.9919	0.1923		0.0657	0	0.0089	0.0081	0.054
week 8	0.722409	0	0.035873	0.137641	0.586157		0.0665884	0	0.0142535	0.0569392	0.0515007		1.2177	0	0.0333	0.9898	0.191		0.101	0	0.0333	0.0102	0.08
week 9	0.67561	0	0.0392887	0.0709055	0.60702		0.064699	0	0.0127517	0.0468412	0.100297		1.2368	0.0083	0.0069	0.9781	0.2095		0.1484	0.0083	0.0069	0.0219	0.1119
week 10	0.715233	0	0.0396224	0.0709055	0.646642		0.0895016	0	0.0254562	0.0468412	0.122113		0.9594	0	0	0.9344	0.0125		0	0	0	0	0
week 11	0.792316	0	0.0770833	0.0709055	0.723725		0.0943479	0	0.0433514	0.0468412	0.136118		0.9344	0.025	0	0.9094	0.0125		0	0	0	0	0
week 12	0.852363	0	0.0388889	0.0813582	0.774477		0.170364	0	0.0111111	0.0790855	0.245978		NaN	NaN	NaN	NaN	NaN		NaN	NaN	NaN	NaN	NaN
week 13	NaN	NaN	NaN	NaN	NaN		NaN	NaN	NaN	NaN	NaN		0.9219	0.0063	0	0.8969	0.0125		0	0	0	0	0
week 14	0.860101	0.00446429	0.00833333	0.0724297	0.791144		0.19596	0.00446429	0.00833333	0.0701569	0.262644		0.9094	0.0125	0	0.8906	0.0125		0	0	0	0	0
week 15	0.86903	0	0.00892857	0.0768939	0.791739		0.187031	0	0.00892857	0.0746212	0.245382		NaN	NaN	NaN	NaN	NaN		NaN	NaN	NaN	NaN	NaN
week 16	NaN	NaN	NaN	NaN	NaN		NaN	NaN	NaN	NaN	NaN		NaN	NaN	NaN	NaN	NaN		NaN	NaN	NaN	NaN	NaN
100 -200 micron
Means, Cuprizone							SEM, Cuprizone						Means, Control						SEM, Control
timepoint	proportion cells total per week	proportion cells lost per week	proportion of cells gained per week	cumulative proportion of cells surviving	cumulative proportion cells gained		proportion cells total per week	proportion cells lost per week	proportion of cells gained per week	cumulative proportion of cells surviving	cumulative proportion cells gained		proportion cells total per week	proportion cells lost per week	proportion of cells gained per week	cumulative proportion of cells surviving	cumulative proportion cells gained		proportion cells total per week	proportion cells lost per week	proportion of cells gained per week	cumulative proportion of cells surviving	cumulative proportion cells gained
baseline	1	NaN	NaN	NaN	NaN		0	NaN	NaN	NaN	NaN		1	NaN	NaN	NaN	NaN		0	NaN	NaN	NaN	NaN
week 1	0.978526	0.0214744	0	0.978526	0		0.0157313	0.0157313	0	0.0157313	0		1.0395	0	0.0395	1	0.0395		0.0297	0	0.0297	0	0.0297
week 2	0.912987	0.0679757	0	0.912987	0		0.0499754	0.0409459	0	0.0499754	0		1.0526	0.0128	0.0228	0.9872	0.0654		0.0727	0.0128	0.0228	0.0128	0.0654
week 3	0.819543	0.105944	0.0125	0.811764	0.0125		0.062412	0.0254753	0.0109185	0.073753	0.0109185		1.0839	0	0.028	0.9923	0.0916		0.0365	0	0.0099	0.0077	0.0327
week 4	0.596167	0.324172	0.100795	0.487593	0.113295		0.0819863	0.0409754	0.02105	0.0876968	0.0199027		1.093	0	0.0091	0.9923	0.0824		0.038	0	0.0069	0.0077	0.0319
week 5	0.46551	0.299988	0.185998	0.187604	0.299294		0.0535326	0.0464531	0.0335468	0.0626836	0.0331202		1.1028	0.0065	0.0163	0.9858	0.0987		0.0392	0.004	0.0163	0.0071	0.0322
week 6	0.488597	0.0698522	0.101796	0.0868191	0.406499		0.0488447	0.0239936	0.0227586	0.0331035	0.0308159		1.11	0	0.0071	0.9935	0.0981		0.0415	0	0.0071	0.004	0.0378
week 7	0.506651	0.004	0.0553688	0.0588036	0.453512		0.0466356	0.004	0.0123514	0.0276284	0.0459782		1.1301	0	0.0119	0.9964	0.1133		0.0408	0	0.0082	0.0036	0.0349
week 8	0.533072	0.0121373	0.0385583	0.0466663	0.492071		0.047351	0.00643666	0.0166964	0.0322459	0.0534778		1.138	0	0.0244	0.9955	0.1169		0.065	0	0.0244	0.0045	0.0547
week 9	0.540516	0.00268817	0.0357696	0.0368055	0.513152		0.0715058	0.00268817	0.00725826	0.0546373	0.0776076		1.1867	0	0.0167	0.994	0.1587		0.0846	0	0.0167	0.006	0.0716
week 10	0.598694	0	0.0581785	0.0368055	0.571331		0.0655859	0	0.0134251	0.0546373	0.0810114		1.0192	0	0	1	0.0192		0	0	0	0	0
week 11	0.627879	0.00287356	0.0320581	0.033932	0.603389		0.0456044	0.00287356	0.0228138	0.0556888	0.0672912		1.0192	0	0	1	0.0192		0	0	0	0	0
week 12	0.668483	0	0.0766651	0.0675646	0.615082		0.0834714	0	0.0351168	0.0768783	0.00478276		NaN	NaN	NaN	NaN	NaN		NaN	NaN	NaN	NaN	NaN
week 13	NaN	NaN	NaN	NaN	NaN		NaN	NaN	NaN	NaN	NaN		1.0192	0	0	1	0.0192		0	0	0	0	0
week 14	0.72273	0	0.0271234	0.0675646	0.669329		0.088124	0	0.00232628	0.0768783	0.00943531		1.0192	0	0	1	0.0192		0	0	0	0	0
week 15	0.732715	0	0.00998464	0.0675646	0.65219		0.0981086	0	0.00998464	0.0768783	0.0170937		NaN	NaN	NaN	NaN	NaN		NaN	NaN	NaN	NaN	NaN
week 16	NaN	NaN	NaN	NaN	NaN		NaN	NaN	NaN	NaN	NaN		NaN	NaN	NaN	NaN	NaN		NaN	NaN	NaN	NaN	NaN
200-300 micron
Means, Cuprizone							SEM, Cuprizone						Means, Control						SEM, Control
timepoint	proportion cells total per week	proportion cells lost per week	proportion of cells gained per week	cumulative proportion of cells surviving	cumulative proportion cells gained		proportion cells total per week	proportion cells lost per week	proportion of cells gained per week	cumulative proportion of cells surviving	cumulative proportion cells gained		proportion cells total per week	proportion cells lost per week	proportion of cells gained per week	cumulative proportion of cells surviving	cumulative proportion cells gained		proportion cells total per week	proportion cells lost per week	proportion of cells gained per week	cumulative proportion of cells surviving	cumulative proportion cells gained
baseline	1	NaN	NaN	NaN	NaN		0	NaN	NaN	NaN	NaN		1	NaN	NaN	NaN	NaN		0	NaN	NaN	NaN	NaN
week 1	0.986957	0.0159161	0.00287356	0.984084	0.00287356		0.00372583	0.00641815	0.00287356	0.00641815	0.00287356		1.0593	0.0027	0.062	0.9973	0.062		0.0289	0.0027	0.0284	0.0027	0.0284
week 2	0.921792	0.0676036	0.000212585	0.919451	0.00234088		0.0475199	0.0448257	0.000212585	0.0492953	0.00187747		1.1153	0	0.0429	0.9964	0.1188		0.0347	0	0.0074	0.0036	0.0339
week 3	0.788625	0.142885	0.00971853	0.7789	0.0118468		0.0754252	0.033438	0.00548443	0.082193	0.0072139		1.1264	0	0.0331	0.9978	0.1218		0.0222	0	0.0053	0.0022	0.0238
week 4	0.476897	0.380699	0.0689711	0.398202	0.0808179		0.0775285	0.0332793	0.00961982	0.0852553	0.0141558		1.1581	0	0.0317	0.9978	0.1401		0.0284	0	0.0111	0.0022	0.0325
week 5	0.311581	0.266726	0.110988	0.131476	0.191806		0.0776896	0.057958	0.0280191	0.0529321	0.026517		1.1811	0	0.0231	0.9978	0.1631		0.0279	0	0.0047	0.0022	0.0318
week 6	0.293714	0.0521647	0.059303	0.0635817	0.232254		0.0310286	0.0145501	0.00948351	0.0267047	0.0150346		1.1588	0	0.0089	0.9978	0.1408		0.0168	0	0.0038	0.0022	0.0127
week 7	0.319799	0.00434017	0.0516819	0.0359579	0.286387		0.0310551	0.00237642	0.00348022	0.0150185	0.0212564		1.1947	0	0.0237	0.9978	0.1718		0.0203	0	0.014	0.0022	0.0157
week 8	0.371905	0	0.0521069	0.0359579	0.338494		0.0295516	0	0.00697628	0.0150185	0.0198793		1.2268	0	0.0189	1	0.1955		0.0239	0	0.0113	0	0.0187
week 9	0.397655	0.00111111	0.0338569	0.0347871	0.367112		0.0522209	0.00111111	0.00606736	0.0252258	0.0357843		1.2534	0.0017	0.0194	0.9983	0.2134		0.0375	0.0017	0.0053	0.0017	0.0314
week 10	0.446099	0	0.0484443	0.0347871	0.415556		0.047495	0	0.006862	0.0252258	0.0341218		1.2562	0	0.0093	1	0.2223		0	0	0	0	0
week 11	0.485099	0	0.0389997	0.0347871	0.454556		0.0456695	0	0.00811798	0.0252258	0.0283949		1.2684	0	0.0122	1	0.2345		0	0	0	0	0
week 12	0.554504	0.0027999	0.0710351	0.0493808	0.51149		0.114429	0.0027999	0.0325526	0.034445	0.0752406		NaN	NaN	NaN	NaN	NaN		NaN	NaN	NaN	NaN	NaN
week 13	NaN	NaN	NaN	NaN	NaN		NaN	NaN	NaN	NaN	NaN		1.303	0	0.0173	1	0.2691		0	0	0	0	0
week 14	0.60635	0	0.0259232	0.0493808	0.563336		0.128711	0	0.00714116	0.034445	0.0895229		1.3122	0	0.0093	1	0.2611		0	0	0	0	0
week 15	0.613119	0.00445019	0.0112183	0.0449306	0.548631		0.129879	0.00136377	0.00253212	0.0330813	0.0849139		NaN	NaN	NaN	NaN	NaN		NaN	NaN	NaN	NaN	NaN
week 16	NaN	NaN	NaN	NaN	NaN		NaN	NaN	NaN	NaN	NaN		NaN	NaN	NaN	NaN	NaN		NaN	NaN	NaN	NaN	NaN
Figure 2 D,E
control loss anova table zone 1 vs 3								control new anova table zone 1 vs 3
Source'	Sum Sq.'	d.f.'	Singular?'	Mean Sq.'	F'	Prob>F'		Source'	Sum Sq.'	d.f.'	Singular?'	Mean Sq.'	F'	Prob>F'
layer'	4.12598e-05	1	0	4.12598e-05	1	0.324813		layer'	0.000207381	1	0	0.000207381	0.430568	0.517953
timepoint'	0.000123779	3	0	4.12598e-05	1	0.405475		timepoint'	0.00105954	2	0	0.000529768	1.09991	0.349103
layer*timepoint'	0.000123779	3	0	4.12598e-05	1	0.405475		layer*timepoint'	0.00229588	2	0	0.00114794	2.38337	0.113723
Error'	0.00132031	32	0	4.12598e-05	[]	[]		Error'	0.0115595	24	0	0.000481646	[]	[]
Total'	0.00160913	39	0	[]	[]	[]		Total'	0.0151223	29	0	[]	[]	[]
	cup3wk	rec1wk	rec2wk	rec3wk					rec1wk	rec2wk	rec3wk
bonferroni corrected p vals	NaN	NaN	1.38637	NaN				bonferroni corrected p vals	1.20297	0.00362351	1.13522
Figure 2 F,G
cuprizone loss anova table zone 1 vs 3								cuprizone new anova table zone 1 vs 3
Source'	Sum Sq.'	d.f.'	Singular?'	Mean Sq.'	F'	Prob>F'		Source'	Sum Sq.'	d.f.'	Singular?'	Mean Sq.'	F'	Prob>F'
layer'	0.0103662	1	0	0.0103662	1.40634	0.242662		layer'	0.0702136	1	0	0.0702136	11.0934	0.00230711
timepoint'	0.398574	3	0	0.132858	18.0242	1.47955e-07		timepoint'	0.037968	2	0	0.018984	2.99937	0.0649396
layer*timepoint'	0.0638168	3	0	0.0212723	2.88591	0.0474254		layer*timepoint'	0.0157013	2	0	0.00785064	1.24036	0.303693
Error'	0.294844	40	0	0.00737109	[]	[]		Error'	0.18988	30	0	0.00632934	[]	[]
Total'	0.767601	47	0	[]	[]	[]		Total'	0.313763	35	0	[]	[]	[]
	cup3wk	rec1wk	rec2wk	rec3wk					rec1wk	rec2wk	rec3wk
bonferroni corrected p vals	2.18241	0.0442911	2.75127	0.530126				bonferroni corrected p vals	0.0364013	0.489493	0.742738
Figure 2 H:
0-100 micron
Means, Cuprizone							SEM, Cuprizone						Means, Control						SEM, Control
timepoint	# cells total per week	# cells lost per weeks	# cells gained per week	cumulative # of cells surviving	cumulative # cells gained		# cells total per week	# cells lost per weeks	# cells gained per week	cumulative # of cells surviving	cumulative # cells gained		# cells total per week	# cells lost per weeks	# cells gained per week	cumulative # of cells surviving	cumulative # cells gained		# cells total per week	# cells lost per weeks	# cells gained per week	cumulative # of cells surviving	cumulative # cells gained
baseline	15.9167	NaN	NaN	NaN	NaN		1.921	NaN	NaN	NaN	NaN		20.45	NaN	NaN	NaN	NaN		2.6907	NaN	NaN	NaN	NaN
week 1	17.5	0.625	0.125	17.375	0.125		2.0917	0.4732	0.125	2.0246	0.125		23.375	0	1.25	22.125	1.25		2.9466	0	0.5204	2.7186	0.5204
week 2	14.5417	1.3542	0.3333	14.125	0.4167		1.7588	1.133	0.3333	1.7909	0.327		21.5833	0	0.5833	19.75	1.8333		3.8033	0	0.2205	3.3942	0.8819
week 3	13.375	1.9167	0.75	12.2292	1.1667		1.7437	0.4684	0.4787	1.6747	0.7923		23.05	0	0.75	20.45	2.55		3.4282	0	0.2958	2.6907	0.8888
week 4	12.9583	3.7083	3.2917	8.5208	4.4583		1.8868	0.2615	0.6404	1.4586	1.0336		23.55	0	0.5	20.45	2.6		3.5021	0	0.1581	2.6907	0.8754
week 5	12.5833	3.6667	3.125	4.8542	7.5833		2.3924	0.4986	0.9393	1.3056	1.4049		23.45	0.1	0	20.35	2.6		3.5693	0.1	0	2.7541	0.8754
week 6	12.0417	1.5833	1.5417	2.9375	9.125		2.4583	0.4167	0.4001	1.1689	1.5755		25.45	0	0.5	21.65	3.3		4.3	0	0.3162	3.5528	0.8782
week 7	10.65	0.05	0.65	2.275	8.4		2.0821	0.05	0.35	1.2224	1.1113		26.15	0	0.4	21.55	4		4.3557	0	0.1871	3.5972	0.9715
week 8	11.1	0	0.45	2.275	8.85		2.1917	0	0.1658	1.2224	1.1608		26.8125	0	0.5	21.9375	4.125		5.4518	0	0.5	4.617	1.309
week 9	9.4167	0	0.5833	0.9583	8.5		1.3411	0	0.2205	0.5417	1.5207		23.5	0.0833	0.1667	18.5	4		6.2517	0.0833	0.1667	4.5369	1.8764
week 10	9.9167	0	0.5	0.9583	9		1.1577	0	0.2887	0.5417	1.4216		13.5	0	0	13	0.25		0	0	0	0	0
week 11	11.1667	0	1.25	0.9583	10.25		2.048	0	0.9014	0.5417	2.2407		13.25	0.25	0	12.75	0.25		0	0	0	0	0
week 12	9.75	0	0.5	0.9375	8.875		1.25	0	0	0.9375	2.125		NaN	NaN	NaN	NaN	NaN		NaN	NaN	NaN	NaN	NaN
week 13	NaN	NaN	NaN	NaN	NaN		NaN	NaN	NaN	NaN	NaN		13	0.125	0	12.5	0.25		0	0	0	0	0
week 14	9.875	0.0625	0.125	0.8125	9.125		1.625	0.0625	0.125	0.8125	2.375		12.75	0.25	0	12.375	0.25		0	0	0	0	0
week 15	10	0	0.125	0.875	9.125		1.5	0	0.125	0.875	2.125		NaN	NaN	NaN	NaN	NaN		NaN	NaN	NaN	NaN	NaN
week 16	NaN	NaN	NaN	NaN	NaN		NaN	NaN	NaN	NaN	NaN		NaN	NaN	NaN	NaN	NaN		NaN	NaN	NaN	NaN	NaN
100 -200 micron
Means, Cuprizone							SEM, Cuprizone						Means, Control						SEM, Control
timepoint	# cells total per week	# cells lost per weeks	# cells gained per week	cumulative # of cells surviving	cumulative # cells gained		# cells total per week	# cells lost per weeks	# cells gained per week	cumulative # of cells surviving	cumulative # cells gained		# cells total per week	# cells lost per weeks	# cells gained per week	cumulative # of cells surviving	cumulative # cells gained		# cells total per week	# cells lost per weeks	# cells gained per week	cumulative # of cells surviving	cumulative # cells gained
baseline	25.25	NaN	NaN	NaN	NaN		1.4068	NaN	NaN	NaN	NaN		28.75	NaN	NaN	NaN	NaN		2.9854	NaN	NaN	NaN	NaN
week 1	24.25	0.625	0	24.25	0		1.493	0.4732	0	1.493	0		29.875	0	1.125	28.75	1.125		4.0279	0	0.8004	3.8541	0.8004
week 2	22.8333	1.875	0	22.8333	0		1.2088	1.2379	0	1.2088	0		26.9167	0.1667	0.6667	25.0833	1.8333		4.7089	0.1667	0.6667	3.5424	1.8333
week 3	20.5	2.7083	0.375	20.25	0.375		1.6125	0.7258	0.3276	1.8529	0.3276		31.3	0	0.75	28.65	2.65		3.6831	0	0.3162	3.0716	0.9987
week 4	14.7083	8.2083	2.4167	12.0417	2.7917		1.9044	0.9274	0.3745	2.1875	0.4302		31.55	0	0.25	28.65	2.3		3.7236	0	0.1936	3.0716	0.9301
week 5	11.25	7.7083	4.75	4.3333	7.5417		0.9197	1.3361	0.9789	1.2824	1.0575		31.95	0.2	0.6	28.45	2.9		4.0237	0.1225	0.6	2.9858	1.0654
week 6	12.8333	1.7917	2.7917	2.2917	10.6667		1.5951	0.7024	0.7142	0.9093	1.207		33.25	0	0.2	29.65	3		3.1996	0	0.2	2.0211	1.1511
week 7	12.95	0.1	1.45	1.45	11.65		1.546	0.1	0.4213	0.6344	1.7671		34.55	0	0.3	30.35	3.5		3.9006	0	0.2	2.6405	1.1511
week 8	13.6	0.35	1	1.1	12.65		1.5704	0.1871	0.4402	0.781	1.99		35.4375	0	0.75	30.8125	3.75		5.1764	0	0.75	3.3562	1.7619
week 9	14.5	0.0833	0.9167	0.75	14		2.3629	0.0833	0.0833	1.2829	3.0139		39.5833	0	0.6667	33.0833	5.3333		5.9902	0	0.6667	3.495	2.421
week 10	16.0833	0	1.5833	0.75	15.5833		2.4847	0	0.4167	1.2829	3.2734		29.25	0	0	28.75	0.5		0	0	0	0	0
week 11	16.9167	0.0833	0.9167	0.6667	16.5		2.0429	0.0833	0.6821	1.3097	2.9826		29.25	0	0	28.75	0.5		0	0	0	0	0
week 12	16.875	0	2	1.5	15.75		0.625	0	0.75	1.75	1.25		NaN	NaN	NaN	NaN	NaN		NaN	NaN	NaN	NaN	NaN
week 13	NaN	NaN	NaN	NaN	NaN		NaN	NaN	NaN	NaN	NaN		29.25	0	0	28.75	0.5		0	0	0	0	0
week 14	18.375	0	0.75	1.5	17.25		0.625	0	0	1.75	1.25		29.25	0	0	28.75	0.5		0	0	0	0	0
week 15	18.625	0	0.25	1.5	16.75		0.875	0	0.25	1.75	1		NaN	NaN	NaN	NaN	NaN		NaN	NaN	NaN	NaN	NaN
week 16	NaN	NaN	NaN	NaN	NaN		NaN	NaN	NaN	NaN	NaN		NaN	NaN	NaN	NaN	NaN		NaN	NaN	NaN	NaN	NaN
200-300 micron
Means, Cuprizone							SEM, Cuprizone						Means, Control						SEM, Control
timepoint	# cells total per week	# cells lost per weeks	# cells gained per week	cumulative # of cells surviving	cumulative # cells gained		# cells total per week	# cells lost per weeks	# cells gained per week	cumulative # of cells surviving	cumulative # cells gained		# cells total per week	# cells lost per weeks	# cells gained per week	cumulative # of cells surviving	cumulative # cells gained		# cells total per week	# cells lost per weeks	# cells gained per week	cumulative # of cells surviving	cumulative # cells gained
baseline	78.2917	NaN	NaN	NaN	NaN		4.3981	NaN	NaN	NaN	NaN		79.15	NaN	NaN	NaN	NaN		14.2946	NaN	NaN	NaN	NaN
week 1	78.875	1.375	0.25	78.625	0.25		5.0265	0.5543	0.25	4.9302	0.25		90.125	0.25	3.5	86.625	3.5		15.2976	0.25	0.2887	15.5448	0.2887
week 2	71.5417	5.8542	0.0208	71.3333	0.2083		4.1142	3.9068	0.0208	4.1861	0.1635		64.1667	0	2.625	58.4167	5.75		13.9234	0	1.188	12.3527	1.8085
week 3	60.5833	11.6667	0.7083	59.8542	0.8958		5.0504	3.1621	0.4673	5.6811	0.6278		87.55	0	2.45	78.95	8.325		15.3693	0	0.5884	14.279	1.4424
week 4	36.0417	29.75	5.2083	30.1042	6.1042		5.5394	2.6481	0.9319	6.3707	1.341		89.45	0	1.9	78.95	8.725		15.3408	0	0.3674	14.279	0.783
week 5	21.75	21.125	7.6667	8.9792	13.7708		3.3752	4.9184	1.3642	2.9319	1.1486		91.25	0	1.8	78.95	10.525		15.8422	0	0.7	14.279	1.1239
week 6	24.4583	4.5417	4.9167	5.5208	19.1042		3.2535	1.4207	0.8819	2.6439	1.3167		96.05	0	0.8	83.15	11.125		14.1157	0	0.4062	12.1711	1.4087
week 7	25.1	0.35	4.1	2.675	22.625		1.459	0.1871	0.2915	0.9728	1.7029		99.7	0	1.85	83.55	13.825		15.223	0	0.9341	12.3962	2.2795
week 8	29.4	0	4.3	2.675	26.925		1.7132	0	0.668	0.9728	2.0154		102.75	0	2.125	83.6875	16.1562		20.8472	0	1.2645	16.0024	4.0464
week 9	30.5	0.0833	2.75	2.375	28.4583		2.529	0.0833	0.6292	1.5828	3.2726		112.417	0.1667	1.5833	89.75	18.7917		27.5244	0.1667	0.712	20.7681	6.1924
week 10	34.5	0	4	2.375	32.4583		2.81	0	0.7638	1.5828	3.8327		58.5	0	0.25	48.25	8.875		0	0	0	0	0
week 11	37.5833	0	3.0833	2.375	35.5417		2.2189	0	0.6509	1.5828	3.3945		59	0	0.5	48.25	9.375		0	0	0	0	0
week 12	40.125	0.25	5	3.3125	37.3125		2.375	0.25	1.75	2.0625	0.0625		NaN	NaN	NaN	NaN	NaN		NaN	NaN	NaN	NaN	NaN
week 13	NaN	NaN	NaN	NaN	NaN		NaN	NaN	NaN	NaN	NaN		60.75	0	0.875	48.25	11.125		0	0	0	0	0
week 14	43.875	0	1.875	3.3125	41.0625		2.875	0	0.25	2.0625	0.4375		61	0	0.25	48.25	10.5		0	0	0	0	0
week 15	44.375	0.25	0.75	3.0625	39.9375		2.875	0	0	2.0625	0.1875		NaN	NaN	NaN	NaN	NaN		NaN	NaN	NaN	NaN	NaN
week 16	NaN	NaN	NaN	NaN	NaN		NaN	NaN	NaN	NaN	NaN		NaN	NaN	NaN	NaN	NaN		NaN	NaN	NaN	NaN	NaN
Figure 2 H statistical comparisons
cuprizone raw data zone 1 new cells								cuprizone raw data zone 3 new cells
	mouse 1	mouse 2	mouse 3	mouse 4	mouse 5	mouse 6			mouse 1	mouse 2	mouse 3	mouse 4	mouse 5	mouse 6
rec1wk	1	2.25	3	5	3.5	5		rec1wk	2	4.75	7	8.5	5	4
rec2wk	2.5	2.75	1	1	4.5	7		rec2wk	12.5	5.5	7	4	6	11
rec3wk	1.25	2.5	1	1	0.5	3		rec3wk	2.75	5.25	4	9	4.5	4
rec4wk	0.25	0.5	0	0.5	2	NaN		rec4wk	3.5	3.5	5	4.5	4	NaN
rec5wk	0.5	0.25	0	0.5	1	NaN		rec5wk	2.25	3.75	4	6	5.5	NaN
rec6wk	0.25	0.5	1	NaN	NaN	NaN		rec6wk	2	2.25	4	NaN	NaN	NaN
rec7wk	0.5	1	0	NaN	NaN	NaN		rec7wk	2.5	4.5	5	NaN	NaN	NaN
rec8wk	0	0.75	3	NaN	NaN	NaN		rec8wk	3	4.25	2	NaN	NaN	NaN
rec9wk	0.5	0.5	NaN	NaN	NaN	NaN		rec9wk	6.75	3.25	NaN	NaN	NaN	NaN
cuprizone raw data anova table
Source'	Sum Sq.'	d.f.'	Singular?'	Mean Sq.'	F'	Prob>F'
zone'	176.823	1	0	176.823	58.0938	2.167e-10
timepoint'	111.451	8	0	13.9314	4.57705	0.000216785
zone*timepoint'	17.8117	8	0	2.22646	0.731487	0.66323
Error'	182.625	60	0	3.04375	[]	[]
Total'	518.67	77	0	[]	[]	[]
cuprizone raw data comparisons zone 1 vs zone 3
	rec1wk	rec2wk	rec3wk	rec4wk	rec5wk	rec6wk	rec7wk	rec8wk	rec9wk
tstats	-1.69512	-2.74202	-3.48504	-7.57373	-5.59353	-3.25	-4.28661	-1.64897	-2.57143
df	10	10	10	8	8	4	4	4	2
sd	1.95842	2.86883	1.67736	0.720243	1.08829	0.816497	1	1.36168	1.75
bonferroni corrected p	1.08821	0.186846	0.0528435	0.000581606	0.004627	0.282382	0.115024	1.57049	1.11396
Figure 2I (histograms):
baseline
Depth bin	mouse 1	mouse 2	mouse 3	mouse 4	mouse 5	mouse 6	avg	sem
1	6.5	3.5	9	5	6	8	6.33333	0.813087
2	3.25	1.75	7	3.5	9.5	7.5	5.41667	1.22927
3	2.25	2.5	3	2.5	4	5.5	3.29167	0.50997
4	4.25	3	4	2.5	1	4	3.125	0.507239
5	4.75	3.75	4	6	6	5.5	5	0.403113
6	6.75	7	6	5.5	6.5	9.5	6.875	0.569173
7	12	12	21	11	11	11	13	1.61245
8	15.75	16.5	19	16	13.5	15.5	16.0417	0.725766
9	20.75	27.5	30	28.5	20	22	24.7917	1.78234
10	21.75	28	27	31.5	26	19.5	25.625	1.77688
rec 1 week
Depth bin	mouse 1	mouse 2	mouse 3	mouse 4	mouse 5	mouse 6	avg	sem
1	1.25	1.75	3	2	2.5	2.5	2.16667	0.255495
2	0.5	0.25	0	2.5	0.5	2.5	1.04167	0.467336
3	0.5	0	0	2.5	1	0.5	0.75	0.381881
4	0	1.5	0	0	0.5	0	0.333333	0.247207
5	0.5	0.25	1	0.5	1.5	0	0.625	0.221265
6	0.5	0.75	2	1.5	0	1.5	1.04167	0.305619
7	0.25	1.5	1	2.5	1.5	2	1.45833	0.318961
8	0.75	2.25	1	3	1.5	1	1.58333	0.35746
9	0	0.75	2	2	1.5	1	1.20833	0.318961
10	0.25	0	2	1	0	1	0.708333	0.318961
rec 2 weeks
Depth bin	mouse 1	mouse 2	mouse 3	mouse 4	mouse 5	mouse 6	avg	sem
1	3	2.75	3	2.5	6	3	3.375	0.531311
2	0.5	1.75	0	3	1.5	8.5	2.54167	1.2656
3	1.25	0.5	0	2	0.5	1.5	0.958333	0.305619
4	1	1	0	0.5	1.5	0	0.666667	0.247207
5	2.5	2.25	3	1	3	0.5	2.04167	0.430197
6	4.5	1.5	3	3	2	2	2.66667	0.440959
7	3	2.25	2	3	4	1.5	2.625	0.363719
8	4.5	3	1	5	3	4.5	3.5	0.60553
9	4.25	3.25	2	3.5	3.5	3.5	3.33333	0.300463
10	0.25	1.25	2	1	2	3.5	1.66667	0.454911
rec 5 weeks
Depth bin	mouse 1	mouse 2	mouse 3	mouse 4	mouse 5		avg	sem
1	4	4.75	4	4	7		4.75	0.580948
2	1.5	2	1	3.5	4		2.4	0.578792
3	0.25	0.25	1	2.5	1.5		1.1	0.422788
4	2.75	2.75	1	0.5	3		2	0.518411
5	3	3	5	1.5	3		3.1	0.556776
6	5.75	4.25	8	4	8		6	0.869626
7	4.5	4.25	8	8	5.5		6.05	0.823104
8	6.75	4.75	7	9.5	7.5		7.1	0.760756
9	7.5	6.75	7	11	8.5		8.15	0.772981
10	1.75	5.75	7	2.5	3		4	1.00933

## Sheet: Figure 3
Figure 3C
								CUPRIZONE individual animals					CONTROL individual animals
		stable, ALL	last vs baseline, ALL	stable, 0-100	last vs baseline, 0-100			stable, ALL	last vs baseline, ALL	stable, 0-100	last vs baseline, 0-100		stable, ALL	last vs baseline, ALL	stable, 0-100	last vs baseline, 0-100
CUPRIZONE	Means	10.2888	15.6471	11.1062	17.5269			11.0824	35.6162	8.39882	42.6711		12.6833	18.6718	13.1727	14.9639
	SEM	1.54629	1.45187	0.661045	1.22344			12.7576	40.482	12.4593	64.5607		7.57578	13.1134	9.728	16.2198
								9.09542	39.369	9.73076	60.2774		8.94632	14.5507	10.2455	15.7553
CONTROL	Means	11.1642	36.3508	10.1001	55.7086			12.2924	37.3252	9.62352	62.6009		7.14783	12.3998	10.2399	19.2067
	SEM	0.560797	1.8114	0.616567	3.38499			11.6446	37.3181	11.3261	52.6001		15.0907	19.4998	12.1448	21.489
								10.1126	27.9941	9.06198	51.5412
displacement anova table
Source'	SS'	df'	MS'	F'	Prob>F'
Groups'	11183.1	7	1597.59	97.2042	1.92354e-21
Error'	591.674	36	16.4354	[]	[]
Total'	11774.8	43	[]	[]	[]
control vs cuprizone comparisons
	self-self 300	all 300	self-self 100	all 100
	tstat: -0.5732	tstat: -8.6507	tstat: 1.1106	tstat: -9.7856
	df: 9	df: 9	df: 9	df: 9
	sd: 2.5222	sd: 3.9524	sd: 1.4961	sd: 6.4436
bonferroni corrected p vals	4.64455	9.43148e-05	2.36426	3.42738e-05
control-control comparisons				cuprizone-cuprizone comparisons
	300 self-self vs all	100 self-self vs all			300 self-self vs all	100 self-self vs all
	tstat: -2.5262	tstat: -4.6172			tstat: -13.2825	tstat: -13.2556
	df: 8	df: 8			df: 10	df: 10
	sd: 3.3537	sd: 2.1987			sd: 3.2844	sd: 5.9594
bonferroni corrected p vals	0.283697	0.0137309		bonferroni corrected p vals	8.94553e-07	9.11957e-07
Figure 3 E	number			Figure 3 G	length			Figure 3 F	total length
	avg	sem			avg	sem			avg	sem
control	50.8	1.99332		control	62.5998	2.56735		control	3173.83	164.219
cuprizone	52.4444	2.62731		cuprizone	72.2948	2.24261		cuprizone	3716.31	235.767
	individual animals - NUMBER				individual animals - LENGTH				individual animals - total length
	ctrl	cupr			ctrl	cupr			ctrl	cupr
	42	43			73.6524	66.9391			3093.4	2878.38
	51	50			72.7524	75.9728			3710.37	3798.64
	48	49			66.0773	74.4356			3171.71	3647.34
	59	61			66.1132	74.8323			3900.68	4564.77
	46	42			68.1025	81.2269			3132.71	3411.53
	48	49			57.7196	67.3381			2770.54	3299.57
	47	51			50.1771	60.3588			2358.32	3078.3
	59	62			57.5251	81.4826			3393.98	5051.92
	48	65			52.1806	68.067			2504.67	4424.35
	60	NaN			61.6979	NaN			3701.88	NaN
p_numSheaths =				p_lnthSheaths =				p_totLnth =
0.6309				0.0135				0.0469
tstat: 0.4892				tstat: 2.7573				tstat: 2.1432
df: 17				df: 17				df: 17
sd: 7.3157				sd: 7.6526				sd: 630.7692

## Sheet: Figure 4
Figure 4B
bsln		ctrl		cupr
xy	z	xy	z	xy	z
67	24	81	28	74	33
77	31	82	21	91	34
71	44	84	27	85	35
92	32	77	34	91	28
79	23	63	37	98	37
66	28	78	40	78	33
73	36	79	33	86	31
		73	45	79	39
		68	28
		72	29
	means				SEM
	xy	z			xy	z
bsln	75	31.1429		bsln	3.35942	2.74667
ctrl	75.7	32.2		ctrl	2.09788	2.23507
cupr	85.25	33.75		cupr	2.82685	1.20638
	one-way ANOVA						multiple comparisons (Tukey's HSD)
Source'	SS'	df'	MS'	F'	Prob>F'		comparison test	timepoint A	timepoint B	lower bound	estimate	upper bound	p
Groups'	528.56	2	264.28	4.41269	0.0244713		1	1	2	-10.2805	-0.7	8.88046	0.981615
Error'	1317.6	22	59.8909	[]	[]		2	1	3	-20.3115	-10.25	-0.188501	0.0453324
Total'	1846.16	24	[]	[]	[]		3	2	3	-18.7715	-9.55	-0.328484	0.0414681
Figure 4E - overlap
real	random
0.608768	0.370964			avg	sem
0.372093	0.289482		real	0.5908	0.0583
0.57953	0.466898		random	0.4432	0.0474
0.513508	0.423467
0.790013	0.473667
0.68107	0.634564
Source'	SS'	df'	MS'	F'	Prob>F'
Groups'	0.0654077	1	0.0654077	3.86027	0.0778193
Error'	0.169438	10	0.0169438	[]	[]
Total'	0.234846	11	[]	[]	[]
Figure 4F - nonoverlap
real	random
1.01432	1.3848			avg	sem
0.974991	1.10981		real	1.1589	0.1414
0.87422	0.816422		random	1.252	0.151
1.00917	0.919638
1.26558	1.49252
1.81491	1.78881
Source'	SS'	df'	MS'	F'	Prob>F'
Groups'	0.0260212	1	0.0260212	0.202662	0.662183
Error'	1.28397	10	0.128397	[]	[]
Total'	1.30999	11	[]	[]	[]

## Sheet: Figure 5
FIgure 5C
	control data				cuprizone data
	baseline	8 weeks			baseline	8 weeks
	105	105			97.5	87.5
	180.5	236			78.5	107
	134	169			133.5	153.5
	127	149			177	167
	89.5	134.5			89	125
avg	127.2	158.7		avg	115.1	128
sem	15.494	21.96		sem	18.0287	14.5971
paired ttest					paired ttest
p =					p =
0.0307					0.2537
tstat: -3.2726					tstat: -1.3319
df: 4					df: 4
sd: 21.5232					sd: 21.6576
Figure 5D
	cuprizone fate proportions
	mouse 1	mouse 2	mouse 3	mouse 4	mouse 5	mean	sem
stable	0.189744	0.229299	0.157303	0.138418	0.0674157	0.156436	0.0270818
lost	0.307692	0.299363	0.333333	0.364407	0.314607	0.32388	0.0115778
replaced	0.487179	0.464968	0.498127	0.457627	0.617978	0.505176	0.0291336
novel	0.205128	0.66242	0.483146	0.30791	0.719101	0.475541	0.0988753
	control fate proportions
	mouse 1	mouse 2	mouse 3	mouse 4	mouse 5	mean	sem
stable	1	0.99169	0.992537	1	0.972067	0.991259	0.00511352
lost	0	0.00831025	0.00746269	0	0.027933	0.00874118	0.00511352
replaced	NaN	NaN	NaN	NaN	NaN	NaN	NaN
novel	0	0.315789	0.268657	0.173228	0.530726	0.25768	0.0870582
Figure 5 F
prop repl	bsln shth num
0.285714	26
0.0408163	54
0.714286	83
0.413333	61
0.69697	81
0.388889	63
0.26087	32
0.233333	68
0.207547	29
0.580645	55
0.262295	29
0.261905	30
0.306122	55

## Sheet: Figure 6
Figure 6 D,E,G,H
baseline control data				baseline cuprizone data				8 weeks control data				8 weeks cuprizone data
undefined	0 neighbors	>= 1 neighbor		undefined	0 neighbors	>= 1 neighbor		undefined	0 neighbors	>= 1 neighbor		undefined	0 neighbors	>= 1 neighbor
0.047619	0.552381	0.4		0.0974359	0.287179	0.615385		0.0571429	0.504762	0.438095		0.0857143	0.325714	0.588571
0.0304709	0.285319	0.684211		0.0254777	0.33121	0.643312		0.0275424	0.256356	0.716102		0.0140187	0.350467	0.635514
0.0597015	0.41791	0.522388		0.0674157	0.202247	0.730337		0.0532544	0.384615	0.56213		0.0618893	0.338762	0.599349
0.023622	0.409449	0.566929		0.0169492	0.316384	0.666667		0.0134228	0.38255	0.604027		0.0479042	0.200599	0.751497
0.0502793	0.296089	0.653631		0.0561798	0.179775	0.764045		0.0520446	0.286245	0.66171		0.048	0.264	0.688
baseline anova table								8 weeks anova table
Source'	Sum Sq.'	d.f.'	Singular?'	Mean Sq.'	F'	Prob>F'		Source'	Sum Sq.'	d.f.'	Singular?'	Mean Sq.'	F'	Prob>F'
type'	1.66612	2	0	0.833059	101.05	5.48324e-13		type'	1.673	2	0	0.8365	154.525	3.70014e-15
cond'	0	1	0	0	0	1		cond'	0	1	0	0	0	1
Error'	0.214345	26	0	0.00824404	[]	[]		Error'	0.140747	26	0	0.00541335	[]	[]
Total'	1.88046	29	0	[]	[]	[]		Total'	1.81375	29	0	[]	[]	[]
baseline							8 weeks
multiple comparisons (bonferroni)							multiple comparisons (bonferroni)
		lower bound	estimate	upper bound	p				lower bound	estimate	upper bound	p
1	2	-0.411488	-0.280279	-0.14907	3.75541e-06		1	2	-0.411488	-0.280279	-0.14907	3.75541e-06
1	3	-0.708384	-0.577175	-0.445966	1.35238e-12		1	3	-0.708384	-0.577175	-0.445966	1.35238e-12
1	4	-0.107132	-5.55112e-17	0.107132	1		1	4	-0.107132	-5.55112e-17	0.107132	1
1	5	-0.44967	-0.280279	-0.110889	0.000202388		1	5	-0.44967	-0.280279	-0.110889	0.000202388
1	6	-0.746565	-0.577175	-0.407785	4.13182e-10		1	6	-0.746565	-0.577175	-0.407785	4.13182e-10
2	3	-0.428105	-0.296896	-0.165687	1.37343e-06		2	3	-0.428105	-0.296896	-0.165687	1.37343e-06
2	4	0.110889	0.280279	0.44967	0.000202388		2	4	0.110889	0.280279	0.44967	0.000202388
2	5	-0.107132	-5.55112e-17	0.107132	1		2	5	-0.107132	-5.55112e-17	0.107132	1
2	6	-0.466286	-0.296896	-0.127506	8.83245e-05		2	6	-0.466286	-0.296896	-0.127506	8.83245e-05
3	4	0.407785	0.577175	0.746565	4.13182e-10		3	4	0.407785	0.577175	0.746565	4.13182e-10
3	5	0.127506	0.296896	0.466286	8.83245e-05		3	5	0.127506	0.296896	0.466286	8.83245e-05
3	6	-0.107132	-1.11022e-16	0.107132	1		3	6	-0.107132	-1.11022e-16	0.107132	1
4	5	-0.411488	-0.280279	-0.14907	3.75541e-06		4	5	-0.411488	-0.280279	-0.14907	3.75541e-06
4	6	-0.708384	-0.577175	-0.445966	1.35238e-12		4	6	-0.708384	-0.577175	-0.445966	1.35238e-12
5	6	-0.428105	-0.296896	-0.165687	1.37343e-06		5	6	-0.428105	-0.296896	-0.165687	1.37343e-06
1	ctrl undefined						1	ctrl undefined
2	ctrl 0 neighbors						2	ctrl 0 neighbors
3	ctrl >= 1 neighbor						3	ctrl >= 1 neighbor
4	cupr undefined						4	cupr undefined
5	cupr 0 neighbors						5	cupr 0 neighbors
6	cupr >= 1 neighbor						6	cupr >= 1 neighbor
control bsln vs 8wks anova								cuprizone bsln vs 8wks anova
Source'	Sum Sq.'	d.f.'	Singular?'	Mean Sq.'	F'	Prob>F'		Source'	Sum Sq.'	d.f.'	Singular?'	Mean Sq.'	F'	Prob>F'
type'	1.48418	2	0	0.742089	102.412	4.69869e-13		type'	1.94158	2	0	0.970788	315.287	5.88804e-19
time'	0	1	0	0	0	1		time'	0	1	0	0	0	1
Error'	0.188398	26	0	0.00724608	[]	[]		Error'	0.0800557	26	0	0.00307907	[]	[]
Total'	1.67258	29	0	[]	[]	[]		Total'	2.02163	29	0	[]	[]	[]
control novel vs stable anova
Source'	Sum Sq.'	d.f.'	Singular?'	Mean Sq.'	F'	Prob>F'
type'	1.15792	2	0	0.57896	88.9525	1.49788e-11
fate'	4.44089e-16	1	0	4.44089e-16	6.82306e-14	1
Error'	0.149699	23	0	0.00650865	[]	[]
Total'	1.30762	26	0	[]	[]	[]

## Sheet: Figure 7
Figure 7 G						means
image condition	# isolated	# heminodes	# nodes			# isolated	# heminodes	# nodes
sham4wk	413	428	703		sham4wk	321.167	415.667	797.5
sham4wk	385	429	652		sham6wk	325.5	389.333	823.833
sham4wk	183	343	754		cupr4wk	361	300	373.625
sham4wk	208	324	747		cupr6wk	599.375	110.375	41.375
sham4wk	266	375	931
sham4wk	472	595	998			sems
sham6wk	285	293	538			# isolated	# heminodes	# nodes
sham6wk	241	268	528		sham4wk	63.4273	44.2025	86.1181
sham6wk	383	511	886		sham6wk	34.6061	68.0419	153.428
sham6wk	382	518	883		cupr4wk	35.6937	34.6813	72.196
sham6wk	289	320	965		cupr6wk	108.1	30.5119	25.3512
sham6wk	373	426	1143
cupr4wk	519	370	419
cupr4wk	416	367	386
cupr4wk	387	378	502
cupr4wk	285	198	257
cupr4wk	466	266	204
cupr4wk	174	151	159
cupr4wk	352	327	441
cupr4wk	289	343	621
cupr6wk	864	68	8
cupr6wk	958	132	14
cupr6wk	516	50	4
cupr6wk	373	28	9
cupr6wk	599	213	98
cupr6wk	326	162	133
cupr6wk	242	36	11
cupr6wk	917	194	54

## Sheet: Supplemental Figure 2
	control	cuprizone + recovery
	13.3773	15.3299
	13.5871	14.6349
	13.9029	17.3307
	15.5671	12.0288
	12.2591	10.3629		p =
	10.5129	13.5092		0.7043
	12.0841	10.2832		tstat: 0.3838
	13.7071	10.2703		df: 25
	13.5282	13.0554		sd: 1.8058
		12.2299
		12.8738
		12.3907
		15.5671
		12.2591
		10.5129
		12.0841
		13.7071
		13.5282
mean	13.1695	12.8866
sem	0.471207	0.462799

## Sheet: Supplemental Figure 4
ng2 data						gfap data
	bsln						bsln
0-100	9.0000 9.0000 8.0000 10.5000					0-100	10.5000 12.0000 15.5000 14.5000
100-200	6.5000 8.5000 7.0000 7.0000					100-200	6.0000 9.5000 10.0000 9.0000
200-300	6.5000 6.5000 7.0000 7.0000					200-300	4.5000 7.0000 6.0000 7.0000
300-400	5.5000 4.0000 5.5000 4.5000					300-400	2.0000 6.0000 2.0000 2.0000
400-500	7.0000 2.5000 5.0000 5.5000					400-500	1.5000 6.5000 3.0000 0
	cup 1 week						cup 1 week
0-100	10.5000 10.0000 10.5000 9.0000					0-100	13.0000 18.5000 23.5000 20.0000
100-200	6.5000 10.5000 6.5000 4.0000					100-200	15.0000 18.0000 18.0000 20.0000
200-300	6.0000 6.5000 8.0000 5.5000					200-300	9.5000 8.5000 8.5000 25.0000
300-400	6.5000 5.5000 8.0000 4.5000					300-400	4.0000 5.5000 5.5000 12.5000
400-500	4.5000 7.0000 6.5000 4.5000					400-500	0 3.0000 3.0000 14.5000
	cup 2 weeks						cup 2 weeks
0-100	13.0000 13.5000 9.5000 12.5000					0-100	19.0000 14.5000 16.0000 14.0000
100-200	6.5000 6.0000 6.0000 5.5000					100-200	20.5000 11.0000 14.0000 20.5000
200-300	5.5000 5.0000 5.5000 6.5000					200-300	16.0000 5.5000 8.0000 15.0000
300-400	4.0000 3.5000 5.0000 5.5000					300-400	12.0000 6.5000 5.0000 12.5000
400-500	6.5000 4.5000 3.5000 3.5000					400-500	7.0000 7.0000 5.5000 6.0000
	cup 3 weeks						cup 3 weeks
0-100	11.5000 7.0000 7.0000 8.0000					0-100	7 5 11 10
100-200	8.5000 9.5000 5.5000 7.0000					100-200	11 4 6 11
200-300	7.0000 9.0000 6.5000 8.6700					200-300	9 8 8 12
300-400	7.5000 7.5000 6.5000 6.6700					300-400	9 9 5 11
400-500	5.5000 7.5000 7.0000 7.0000					400-500	8 13 6 9
	rec 1 week						rec 1 week
0-100	9.0000 8.0000 8.5000 16.0000 15.0000 10.0000 14.0000 8.0000					0-100	20.0000 10.5000 23.0000 11.5000 15
100-200	5.5000 8.0000 10.5000 5.5000 7.0000 9.0000 7.0000 9.0000					100-200	19.5000 14.0000 17.5000 13.5000 15.5
200-300	9.0000 8.0000 13.5000 12.5000 7.0000 8.0000 5.5000 5.0000					200-300	26.0000 21.5000 13.5000 17.0000 19
300-400	7.0000 6.5000 14.5000 8.0000 6.5000 6.0000 7.5000 9.0000					300-400	30.0000 24.5000 11.5000 12.0000 25.5
400-500	7.0000 6.5000 13.5000 10.0000 5.5000 5.0000 6.5000 8.0000					400-500	26.0000 34.5000 6.0000 22.0000 23
	rec 2 weeks						rec 2 weeks
0-100	7.5000 9.0000 9.5000 10.5000 5.0000					0-100	17.0000 10.0000 14.5000 16.0000
100-200	9.5000 6.5000 5.0000 7.0000 6.5000					100-200	12.5000 13.0000 14.0000 17.5000
200-300	6.5000 7.5000 7.0000 9.0000 4.0000					200-300	13.0000 10.0000 16.0000 15.5000
300-400	5.0000 4.0000 7.0000 8.0000 5.5000					300-400	15.5000 13.0000 22.0000 13.5000
400-500	6.0000 6.5000 6.5000 6.5000 6.0000					400-500	21.0000 14.0000 25.5000 18.5000
	rec 3 weeks						rec 3 weeks
0-100	13.5000 7.5000					0-100	14.0000 13.0000
100-200	5.0000 11.0000					100-200	12.0000 18.5000
200-300	5.5000 5.0000					200-300	15.5000 15.0000
300-400	5.0000 4.0000					300-400	20.5000 17.0000
400-500	8.5000 4.5000					400-500	24.5000 12.0000
	rec 5 weeks						rec 5 weeks
0-100	13.0000 10.0000 12.0000 9.5000					0-100	10.5000 15.0000 13.5000 7.0000
100-200	7.5000 9.0000 9.0000 6.0000					100-200	7.5000 11.0000 9.5000 4.0000
200-300	9.0000 9.5000 9.0000 5.5000					200-300	10.0000 14.0000 9.0000 6.0000
300-400	9.5000 9.0000 6.0000 6.5000					300-400	9.5000 8.5000 12.0000 8.0000
400-500	7.5000 9.0000 8.0000 6.5000					400-500	16.5000 15.5000 11.0000 7.5000
ng2 ratios							gfap ratios
bsln							bsln
0.7778 0.2778 0.6250 0.5238							0.1429 0.5417 0.1935 0
cup 1 week							cup 1 week
0.4286 0.7000 0.6190 0.5000							0 0.1622 0.1277 0.7250
cup 2 weeks							cup 2 weeks
0.5000 0.3333 0.3684 0.2800							0.3684 0.4828 0.3438 0.4286
cup 3 weeks							cup 3 weeks
0.4783 1.0714 1.0000 0.8750							1.1429 2.6000 0.5455 0.9000
rec 1 week							rec 1 week
0.7778 0.8125 1.5882 0.6250 0.3667 0.5000 0.4643 1.0000							1.3000 3.2857 0.2609 1.9130 1.5333
rec 2 weeks							rec 2 weeks
0.8000 0.7222 0.6842 0.6190 1.2000							1.2353 1.4000 1.7586 1.1563
rec 3 weeks							rec 3 weeks
0.6296 0.6000							1.7500 0.9231
rec 5 weeks							rec 5 weeks
0.5769 0.9000 0.6667 0.6842							1.5714 1.0333 0.8148 1.0714
Source'	SS'	df'	MS'	Chi-sq'	Prob>Chi-sq'		Source'	SS'	df'	MS'	Chi-sq'	Prob>Chi-sq'
Groups'	1308.77	7	186.967	12.4802	0.0858327		Groups'	1651.62	7	235.946	19.9834	0.00560573
Error'	2256.73	27	83.5826	[]	[]		Error'	827.875	23	35.9946	[]	[]
Total'	3565.5	34	[]	[]	[]		Total'	2479.5	30	[]	[]	[]
							multiple comparisons LSD
							timepoint A	timepoint B	lower bound	estimate	upper bound	p
							1	2	-12.5995	0	12.5995	1
							1	3	-16.2245	-3.625	8.97454	0.572823
							1	4	-26.4745	-13.875	-1.27546	0.0308988
							1	5	-29.078	-17.125	-5.17203	0.00498444
							1	6	-30.4745	-17.875	-5.27546	0.00542574
							1	7	-31.5562	-16.125	-0.693784	0.0405518
							1	8	-26.2245	-13.625	-1.02546	0.0340496
							2	3	-16.2245	-3.625	8.97454	0.572823
							2	4	-26.4745	-13.875	-1.27546	0.0308988
							2	5	-29.078	-17.125	-5.17203	0.00498444
							2	6	-30.4745	-17.875	-5.27546	0.00542574
							2	7	-31.5562	-16.125	-0.693784	0.0405518
							2	8	-26.2245	-13.625	-1.02546	0.0340496
							3	4	-22.8495	-10.25	2.34954	0.11083
							3	5	-25.453	-13.5	-1.54703	0.0268539
							3	6	-26.8495	-14.25	-1.65046	0.0266431
							3	7	-27.9312	-12.5	2.93122	0.112363
							3	8	-22.5995	-10	2.59954	0.119807
							4	5	-15.203	-3.25	8.70297	0.594094
							4	6	-16.5995	-4	8.59954	0.533788
							4	7	-17.6812	-2.25	13.1812	0.775047
							4	8	-12.3495	0.25	12.8495	0.968978
							5	6	-12.703	-0.75	11.203	0.902123
							5	7	-13.908	1	15.908	0.895403
							5	8	-8.45297	3.5	15.453	0.566032
							6	7	-13.6812	1.75	17.1812	0.824102
							6	8	-8.34954	4.25	16.8495	0.508533
							7	8	-12.9312	2.5	17.9312	0.75084

## Sheet: Supplemental Figure 5
Suppl Figure 5 D
	CONTROL	individual data				CUPRIZONE	individual data
	total extensions	total retractions	net ext length	net ret length		total extensions	total retractions	net ext length	net ret length
	28	28	15.0876	19.136		22	27	14.8631	13.696
	47	7	16.0908	15.5419		36	15	13.2089	20.3952
	38	9	14.8262	6.19683		46	7	19.9996	5.76914
	52	4	17.0216	1.90876		55	7	21.31	9.38414
	38	6	12.0365	2.17583		21	24	17.1809	17.5515
	34	18	11.7227	14.1699		34	15	14.557	6.19888
	41	4	11.5398	4.08904		26	25	9.75544	9.7476
	54	5	13.064	8.99989		47	20	18.8012	13.6225
	42	6	12.1263	8.66269		54	9	16.6749	14.0158
	46	16	13.0786	6.99214		45	15	15.6232	13.4309
mean	42	10.3	13.6594	8.7873		38.6	16.4	16.1974	12.3812
sem	2.29228	2.26053	0.560335	1.66457		3.62366	2.12003	0.971419	1.33437
	CONTROL comparisons				CUPRIZONE comparisons
	LENGTH: ext vs ret	NUM: ext vs ret			LENGTH: ext vs ret	NUM: ext vs ret
	tstat: 2.5092	tstat: 8.9065			tstat: 2.0914	tstat: 4.7831
	df: 18	df: 18			df: 18	df: 18
	sd: 4.3418	sd: 7.9586			sd: 4.0802	sd: 10.3784
bonferroni corrected p	0.175087	4.11469e-07			0.407497	0.00119035
	control vs cuprizone comparisons
	length extensions		number extensions		length retractions		number retractions
	tstat: -2.0471		tstat: 0.7172		tstat: -1.5238		tstat: -1.7804
	df: 18		df: 18		df: 18		df: 18
	sd: 2.7723		sd: 10.5998		sd: 5.2739		sd: 7.6612
bonferroni corrected p	0.444245		3.85943		1.15955		0.735177
Suppl Figure 5 E
	control	cuprizone		p_procLoss =
	14	6		0.4735
	3	1		tstat: -0.7321
	2	5		df: 18
	0	1		sd: 105.6894
	0	4
	5	0
	0	1
	1	5
	0	3
	2	NaN
mean	2.7	2.88889
sem	1.22882	0.657342
Suppl Figure 5 F
	control	cuprizone
	-300.035	-424.51		p_sheathsLost =
	-274.924	-129.932		0.9071
	-251.568	-233.84		tstat: -0.1184
	-228.582	-325.013		df: 17
	-82.2035	-311.892		sd: 3.4725
	-425.612	-207.204
	-139.834	-237.856
	-403.905	-297.455
	-59.582	-201.04
	-157.343	-300.872
mean	-232.359	-266.961
sem	35.6927	23.5348
Suppl Figure 5 I		CONTROL									CUPRIZONE
mouse	2d	4d	6d		8d	10d	12d	14d		mouse	2d	4d	6d	8d	10d	12d	14d
1	621.994	226.915	2.24219		158.292	56.9904	47.6204	16.58		1	290.621	36.4157	187.879	40.1676	49.6888	31.2863	24.7871
2	36.3893	223.168	160.533		103.243	44.9962	20.7734	58.3728		2	64.4887	162.844	92.0394	22.845	113.291	0	59.3347
3	145.734	159.36	71.5094		41.2737	33.028	57.1778	0.457797		3	279.614	277.689	111.087	93.3428	43.2387	55.2648	19.3637
4	451.393	203.487	162.552		NaN	NaN	60.0582	59.6616		4	515.103	308.966	206.407	25.3936	39.8167	25.2846	14.6067
5	177.634	96.4514	89.6707		80.575	NaN	NaN	48.7069		5	548.986	242.916	98.2296	74.4723	6.01124	60.6128	18.3276
6	317.839	283.112	38.7595		27.8402	33.8789	39.5245	38.2368		6	118.328	169.813	73.3995	16.4525	86.9072	36.1595	26.7853
7	90.9903	161.274	82.8717		31.2299	20.5826	43.7271	26.0993		7	175.944	182.61	NaN	NaN	14.1371	17.4226	24.4239
8	99.8778	208.385	190.86		65.3448	50.236	32.4178	13.3359		8	259.755	426.131	162.376	221.361	61.0941	NaN	NaN
9	202.647	130.847	43.6723		23.1929	35.7484	3.33463	17.8869		9	469.988	239.874	64.4408	0	NaN	NaN	NaN
10	102.986	129.202	225.23		102.611	64.7065	75.0483	4.06974		10	10.4776	291.664	220.395	NaN	NaN	NaN	NaN
avg	224.749	182.22	106.79		70.4003	42.5209	42.1869	28.3408		avg	273.331	233.892	135.139	61.7543	51.7731	32.2901	26.8041
sem	58.7441	17.8755	23.2727		14.3147	4.56567	6.82499	6.8637		sem	59.6148	33.1236	18.8678	22.6153	11.2354	6.65678	4.73279
CONTROL	N-way ANOVA								CUPRIZONE	N-way ANOVA
Source'	Sum Sq.'	d.f.'	Singular?'		Mean Sq.'	F'	Prob>F'		Source'	Sum Sq.'	d.f.'	Singular?'	Mean Sq.'	F'	Prob>F'
X1'	338971	6	0		56495.2	8.05319	2.28201e-06		X1'	541141	6	0	90190.2	9.4608	5.12248e-07
Error'	413900	59	0		7015.26	[]	[]		Error'	495719	52	0	9533.05	[]	[]
Total'	752872	65	0		[]	[]	[]		Total'	1.03686e+06	58	0	[]	[]	[]
CONTROL	multiple comparisons (bonferroni)								CUPRIZONE	multiple comparisons (bonferroni)
comparison test	timepoint A	timepoint B	lower bound		estimate	upper bound	p		comparison test	timepoint A	timepoint B	lower bound	estimate	upper bound	p
1	1	2	-76.405		42.5284	161.462	1		1	1	2	-100.048	39.4384	178.925	1
2	1	3	-0.974811		117.959	236.892	0.0539629		2	1	3	-5.11706	138.191	281.5	0.0693003
3	1	4	32.1558		154.348	276.541	0.00362649		3	1	4	63.6289	211.576	359.524	0.000641556
4	1	5	56.0798		182.228	308.376	0.000503299		4	1	5	73.6101	221.558	369.505	0.000306573
5	1	6	60.3692		182.562	304.754	0.000288158		5	1	6	87.3342	241.04	394.747	0.00013988
6	1	7	77.4744		196.408	315.341	4.68382e-05		6	1	7	92.8202	246.526	400.233	9.37309e-05
7	2	3	-43.5032		75.4302	194.364	1		7	2	3	-44.5555	98.7529	242.061	0.675718
8	2	4	-10.3726		111.82	234.012	0.108215		8	2	4	24.1904	172.138	320.085	0.0103851
9	2	5	13.5514		139.699	265.847	0.0178189		9	2	5	34.1717	182.119	330.066	0.00525374
10	2	6	17.8408		140.033	262.226	0.0121327		10	2	6	47.8958	201.602	355.308	0.00227644
11	2	7	34.946		153.879	272.813	0.00261884		11	2	7	53.3817	207.088	360.794	0.00156127
12	3	4	-85.8028		36.3897	158.582	1		12	3	4	-78.1715	73.3849	224.941	1
13	3	5	-61.8788		64.2691	190.417	1		13	3	5	-68.1902	83.3662	234.923	1
14	3	6	-57.5894		64.6031	186.796	1		14	3	6	-54.3339	102.849	260.032	0.871574
15	3	7	-40.4842		78.4492	197.383	0.851174		15	3	7	-48.848	108.335	265.518	0.67504
16	4	5	-101.346		27.8794	157.105	1		16	4	5	-145.969	9.98124	165.931	1
17	4	6	-97.1534		28.2134	153.58	1		17	4	6	-131.96	29.4642	190.888	1
18	4	7	-80.1329		42.0596	164.252	1		18	4	7	-126.474	34.9502	196.374	1
19	5	6	-128.891		0.333966	129.559	1		19	5	6	-141.941	19.483	180.907	1
20	5	7	-111.968		14.1801	140.328	1		20	5	7	-136.455	24.9689	186.393	1
21	6	7	-108.346		13.8461	136.039	1		21	6	7	-161.232	5.48594	172.204	1
